# Supplementary material for: Capacity building in health care professions within the Gulf cooperation council countries: paving the way forward
Source: PubMed Central journal article supplement (PMC6417223; doi:10.1186/s12909-019-1513-2), 2019-03-14
Supplement: 12909_2019_1513_MOESM1_ESM.pdf [file 12909_2019_1513_MOESM1_ESM.pdf]

**Additional file 1. List of identified healthcare school in the countries of Gulf Cooperation Council**

| <b>Country</b>         | <b>School</b>                                                                                                                                    | <b>Location</b> |
|------------------------|--------------------------------------------------------------------------------------------------------------------------------------------------|-----------------|
| <b>Bahrain</b>         | University of Bahrain, College of Health Sciences (Nursing, Dental Hygiene, Pharmacy, Public Health, Medical Laboratory Technology, Radiography) | Salmaniya       |
|                        | Arabian Gulf University, College of Medicine and Medical Sciences                                                                                | Manama          |
|                        | Royal College of Surgeons in Ireland - Bahrain                                                                                                   | Busaiteen       |
| <b>Kuwait</b>          | Kuwait University, Health Science Center, Faculty of Medicine                                                                                    | Kuwait City     |
|                        | Kuwait University, Health Science Center, Faculty of Allied Health Sciences                                                                      | Kuwait City     |
|                        | Kuwait University, Health Science Center, Faculty of Pharmacy                                                                                    | Kuwait City     |
|                        | Kuwait University, Health Science Center, Faculty of Dentistry                                                                                   | Kuwait City     |
|                        | Kuwait University, Health Science Center, Faculty of Public Health                                                                               | Kuwait City     |
|                        | Kuwait Institute for Medical Specialization                                                                                                      | Kuwait City     |
|                        | The American University for Medical Sciences-Kuwait, School of Medicine                                                                          | Kuwait City     |
|                        | The American University for Medical Sciences-Kuwait, School of Dental Medicine                                                                   | Kuwait City     |
|                        | The American University for Medical Sciences-Kuwait, School of Pharmacy                                                                          | Kuwait City     |
|                        | The American University for Medical Sciences-Kuwait, College of Health Sciences                                                                  | Kuwait City     |
| The College of Nursing | Kuwait City                                                                                                                                      |                 |
| <b>Oman</b>            | Al-Dhahira Nursing Institute (regional)                                                                                                          | Al-Dhahira      |
|                        | Oman Medical College                                                                                                                             | Bawshar         |
|                        | Ibra Nursing Institute (regional)                                                                                                                | Ibra            |
|                        | Institute of Health Sciences                                                                                                                     | Matrah          |
|                        | Oman Dental College                                                                                                                              | Muscat          |
|                        | Sultan Qaboos University, College of Medicine and Health Sciences                                                                                | Muscat          |
|                        | Sultan Qaboos University, College of Nursing                                                                                                     | Muscat          |
|                        | Oman Nursing Institute                                                                                                                           | Muscat          |

---

|                             |                                                                                     |           |
|-----------------------------|-------------------------------------------------------------------------------------|-----------|
|                             | Muscat Nursing Institute                                                            | Muscat    |
|                             | Institutes of Health Sciences, Oman Institute for Health Information Management     | Muscat    |
|                             | Higher College of Technology, College of Pharmacy                                   | Muscat    |
|                             | Al-Dakhilia Nursing Institute (regional)                                            | Nizwa     |
|                             | Rustaq Nursing Institute (regional)                                                 | Rustaq    |
|                             | Salalah Nursing Institute (regional)                                                | Salalah   |
|                             | North Batinah Nursing Institute (regional)                                          | Sohar     |
|                             | Sohar Nursing Institute (regional)                                                  | Sohar     |
|                             | Sur Nursing Institute (regional)                                                    | Sur       |
|                             | Oman Assistant Pharmacist Institute                                                 | Wataya    |
| <b>Qatar</b>                | Qatar University, College of Medicine                                               | Doha      |
|                             | Qatar University, College of Pharmacy                                               | Doha      |
|                             | Qatar University, College of Health Sciences                                        | Doha      |
|                             | Weill Cornell Medicine-Qatar                                                        | Doha      |
|                             | College of the North Atlantic Qatar, School of Health Sciences                      | Doha      |
|                             | University of Calgary in Qatar                                                      | Doha      |
| <b>United Arab Emirates</b> | New York University Abu Dhabi                                                       | Abu Dhabi |
|                             | Fatima College of Health Sciences                                                   | Abu Dhabi |
|                             | Gulf Medical University, College of Medicine                                        | Ajman     |
|                             | Gulf Medical University, College of Dentistry                                       | Ajman     |
|                             | Gulf Medical University, College of Pharmacy                                        | Ajman     |
|                             | Gulf Medical University, College of Health Sciences                                 | Ajman     |
|                             | Gulf Medical University, College of Graduate studies                                | Ajman     |
|                             | United Arab Emirates University, College of Medicine and Health Sciences            | Al Ain    |
|                             | Dubai Medical College for Girls                                                     | Dubai     |
|                             | Mohammed bin Rashid University of Medicine and Health Sciences, College of Medicine | Dubai     |
|                             | Hamdan Bin Morhammed College of Dental Medicine                                     | Dubai     |

---

---

|                     |                                                                                             |                |
|---------------------|---------------------------------------------------------------------------------------------|----------------|
|                     | The Royal College of Surgeons in Ireland – Dubai                                            | Dubai          |
|                     | Harvard Medical School for Global Health Delivery – Dubai                                   | Dubai          |
|                     | Dubai Pharmacy College                                                                      | Dubai          |
|                     | International Health And Safety Training Center                                             | Dubai          |
|                     | Ras al-Khaimah Medical and Health Sciences University, College of Medical Sciences          | Ras Al-Khaimah |
|                     | Ras al-Khaimah Medical and Health Sciences University, College of Dental Sciences           | Ras Al-Khaimah |
|                     | Ras al-Khaimah Medical and Health Sciences University, College of Pharmaceutical Sciences   | Ras Al-Khaimah |
|                     | Ras al-Khaimah Medical and Health Sciences University, College of Nursing                   | Ras Al-Khaimah |
|                     | University of Sharjah, College of Health Sciences                                           | Sharjah        |
|                     | University of Sharjah, College of Medicine                                                  | Sharjah        |
|                     | University of Sharjah, College of Dental Medicine                                           | Sharjah        |
|                     | University of Sharjah, College of Pharmacy                                                  | Sharjah        |
|                     | University of Sharjah, Clinical and surgical Training Center                                | Sharjah        |
| <b>Saudi Arabia</b> | King Khalid University College of Medicine and Medical Sciences                             | Abha           |
|                     | King Faisal University                                                                      | Al Ahsa        |
|                     | Al Baha University, Medical College                                                         | Al Baha        |
|                     | Al Baha University, Faculty of Dentistry                                                    | Al Baha        |
|                     | Al Baha University, Faculty of Clinical Pharmacy                                            | Al Baha        |
|                     | Al Baha University, Faculty of Applied Medical Sciences                                     | Al Baha        |
|                     | Sulaiman Alrajhi College of Medicine, Al Bukairiyah                                         | Al Bukayriyah  |
|                     | Taibah University College of Medicine                                                       | Al Madinah     |
|                     | Majmaah University College of Medicine                                                      | Al Majmaah     |
|                     | King Saud bin Abdulaziz University for Health Sciences, College of Applied Medical Sciences | Al-Ahsa        |
|                     | Prince Sattam Bin Abdulaziz University College of Medicine, Al-Kharj                        | Al-Kharj       |
|                     | Northern Borders University College of Medicine                                             | Arar           |

---

---

|                                                                                             |          |
|---------------------------------------------------------------------------------------------|----------|
| College of Medicine, University of Bisha                                                    | Bisha    |
| Qassim University College of Medicine                                                       | Buraidah |
| College of Dentistry                                                                        | Buraidah |
| University of Dammam College of Medicine                                                    | Dammam   |
| College of Dentistry (Females)                                                              | Dammam   |
| Mohammed Al-mana College Of Health Science (MACHS),                                         | Dammam   |
| King Faysal University, College of Clinical Pharmacy                                        | Dammam   |
| University of Hail College of Medicine                                                      | Hail     |
| Jazan University Faculty of Medicine                                                        | Jazan    |
| College of Dentistry                                                                        | Jazan    |
| Jazan University Faculty of Dentistry                                                       | Jazan    |
| Jazan University Faculty of Pharmacy                                                        | Jazan    |
| Jazan University Faculty of Applied Medical Sciences                                        | Jazan    |
| Jazan University Faculty of Health Sciences                                                 | Jazan    |
| Batterjee Medical College, Medical program                                                  | Jeddah   |
| Ibn Sina National College for Medical Studies, Jeddah                                       | Jeddah   |
| King Abdulaziz University Faculty of Medicine                                               | Jeddah   |
| King Saud bin Abdulaziz University for Health Sciences, College of Medicine                 | Jeddah   |
| Ibn Sina National Medical College, Dentistry program                                        | Jeddah   |
| Ibn Sina National Medical College, Pharmacy program                                         | Jeddah   |
| King Abdulaziz University Faculty of Dentistry                                              | Jeddah   |
| King Abdulaziz University Faculty of Pharmacy                                               | Jeddah   |
| Ibn Sina National Medical College, Nursing program                                          | Jeddah   |
| King Saud bin Abdulaziz University for Health Sciences, College of Applied Medical Sciences | Jeddah   |
| King Abdulaziz University Faculty of Nursing                                                | Jeddah   |
| King Abdulaziz University                                                                   | Jizan    |
| Al-Majmaah University, College of Medicine                                                  | Majmaah  |
| Umm Al-Qura University College of Medicine and Medical Sciences                             | Makkah   |

---

---

|                                                                                                         |        |
|---------------------------------------------------------------------------------------------------------|--------|
| Najran University College of Medicine                                                                   | Najran |
| Alfaisal University, College of Medicine                                                                | Riyadh |
| Al-Farabi Colleges                                                                                      | Riyadh |
| Almaarefa College of Medicine, College of Medicine                                                      | Riyadh |
| Global Colleges College of Medicine                                                                     | Riyadh |
| King Fahad Medical City Faculty of Medicine                                                             | Riyadh |
| King Saud bin Abdulaziz University for Health Sciences, College of Medicine                             | Riyadh |
| King Saud University College of Medicine                                                                | Riyadh |
| Princess Nourah Bint Abdulrahman University College of Medicine                                         | Riyadh |
| Riyadh Colleges of Dentistry and Pharmacy                                                               | Riyadh |
| College of Dentistry - BUC                                                                              | Riyadh |
| College of Dentistry                                                                                    | Riyadh |
| Batterjee Medical College, Dentistry program                                                            | Riyadh |
| King Saud bin Abdulaziz University for Health Sciences, College of Dentistry                            | Riyadh |
| King Saud bin Abdulaziz University for Health Sciences, College of Pharmacy                             | Riyadh |
| Batterjee Medical College, Pharmacy program                                                             | Riyadh |
| King Saud University, College of Pharmacy                                                               | Riyadh |
| Almaarefa College of Medicine, College of Pharmacy                                                      | Riyadh |
| Alfaisal University, College of Pharmacy                                                                | Riyadh |
| Batterjee Medical College, Nursing program                                                              | Riyadh |
| Batterjee Medical College, Physical therapy program                                                     | Riyadh |
| Batterjee Medical College, Radiologic Sciences program                                                  | Riyadh |
| Almaarefa College of Medicine, College of Applied Sciences                                              | Riyadh |
| Batterjee Medical College, Healthcare admin program                                                     | Riyadh |
| King Saud University, College of Nursing                                                                | Riyadh |
| King Saud bin Abdulaziz University for Health Sciences, College of Public Health and Health Informatics | Riyadh |

---

---

|                                                                                                    |                         |
|----------------------------------------------------------------------------------------------------|-------------------------|
| King Saud bin Abdulaziz University for Health Sciences, College of Applied Medical Sciences        | Riyadh                  |
| King Saud bin Abdulaziz University for Health Sciences, Colleges of Science and Health Professions | Riyadh, Al-Ahsa         |
| King Saud bin Abdulaziz University for Health Sciences, Colleges of Nursing                        | Riyadh, Jeddah, Al-Ahsa |
| Al-Jouf University, College of Medicine                                                            | Sakaka                  |
| Al-Jouf University, College of Dentistry                                                           | Sakaka                  |
| Al-Jouf University, College of Pharmacy                                                            | Sakaka                  |
| Al-Jouf University, College of Applied Medical Sciences                                            | Sakaka                  |
| Tabuk University                                                                                   | Tabuk                   |
| University of Tabuk Faculty of Medicine                                                            | Tabuk                   |
| Taif University College of Medicine                                                                | Taif                    |
| Unaizah College of Medicine                                                                        | Unaizah                 |

---
